# Supplementary material for: Prescription, Compliance, and Burden Associated with Salt-Restricted Diets in Heart Failure Patients: Results from the French National OFICSel Observatory
Source: MDPI journal article supplement (doi:10.3390/nu14020308), 2022-01-12
Supplement: s1 [file s1]

## Supplementary tables

**Supplemental Table 1.** Patient-reported outcomes according to the level of burden associated with salt diet as assessed by the BIRD score

| BIRD Score                                                                         | Lowest to medium burden<br>Q1 to Q3 | Highest burden<br>Q4 |
|------------------------------------------------------------------------------------|-------------------------------------|----------------------|
| <i>N</i>                                                                           | 1983                                | 619                  |
| Factors assessed                                                                   | Mean (±SD)                          | Mean (±SD)           |
| <b>Burden scale In Restricted Diets (BIRD) questionnaire</b>                       |                                     |                      |
| BIRD total score (maximum score = 48)                                              | 3.9 (±3.9)                          | 21.4 (±6.9)          |
| Detailed items, (each item score from 0-4)                                         |                                     |                      |
| <i>On account of my diet, I am not living as I would like, because...</i>          |                                     |                      |
| ...every meal is difficult for me                                                  | 0.4 (±0.7)                          | 1.6 (±1.2)           |
| ...having a meal away from home is complicated                                     | 0.5 (±0.9)                          | 2.0 (±1.4)           |
| ...grocery shopping is complicated                                                 | 0.4 (±0.8)                          | 1.7 (±1.4)           |
| ...it results in additional expenses                                               | 0.3 (±0.6)                          | 1.6 (±1.2)           |
| ...I have the impression of being a bother or a burden to those preparing my meals | 0.2 (±0.6)                          | 1.4 (±1.3)           |
| ...it makes relationships or activities with friends or family difficult           | 0.2 (±0.5)                          | 1.6 (±1.2)           |
| ...it makes my leisure activities difficult (favourite pastimes, sports)           | 0.4 (±0.8)                          | 2.1 (±1.4)           |
| ...it prevents me from travelling, going on vacation                               | 0.3 (±0.8)                          | 2.2 (±1.4)           |
| ...it makes me feel tired, weary or I lack energy                                  | 0.6 (±0.9)                          | 2.6 (±1.1)           |
| ...it is difficult to manage in my workplace/professional activity                 | 0.1 (±0.5)                          | 1.2 (±1.5)           |
| ...it depresses me                                                                 | 0.3 (±0.6)                          | 1.8 (±1.2)           |
| ...it aggravates my health                                                         | 0.2 (±0.6)                          | 1.5 (±1.2)           |
| <b>MLHFQ score (maximum score = 105)</b>                                           | 29.6 (±22.2)                        | 56.5 (±19.3)         |
| MLHFQ - Physical dimension (maximum score = 40)                                    | 14.4 (±11.1)                        | 25.0 (±9.5)          |
| MLHFQ - Emotional dimension (maximum score = 25)                                   | 6.2 (±5.8)                          | 13.2 (±5.7)          |

BIRD, burden scale in restricted diets; IQR, interquartile range; MLHFQ, Minnesota Living with Heart Failure

Questionnaire; Q, quartile; SD, standard deviation.

**Supplementary Table 2.** Factors associated with disagreement between salt diet recommended (SD-R) and that understood (SD-U): patient either underestimated the recommendation, for example patient understands 3-6 g whereas <3 g was recommended, or overestimated the recommendation, for example patient understands <3 g whereas 3-6 g was recommended.

| Factors assessed                                  | Agreement     |       | Disagreement           |                     |       |                       |                     |       | <i>p</i> -value<br>OR                                  | <i>p</i> -value<br>OR                                 |
|---------------------------------------------------|---------------|-------|------------------------|---------------------|-------|-----------------------|---------------------|-------|--------------------------------------------------------|-------------------------------------------------------|
|                                                   |               |       | Patient underestimated |                     |       | Patient overestimated |                     |       |                                                        |                                                       |
|                                                   | N             | 1153  |                        | 889                 |       |                       | 626                 |       | Disagreement<br>(Patient underestimated) vs. Agreement | Disagreement<br>(Patient overestimated) vs. Agreement |
|                                                   | <i>n</i> (%)  | Mean  | <i>n</i> (%)           | OR (95% CI)         | Mean  | <i>n</i> (%)          | OR (95% CI)         | Mean  |                                                        |                                                       |
| Age                                               | 1123          | 66.9  | 867                    | 1.01<br>(1.00;1.02) | 68.6  | 600                   | 1.00<br>(0.99;1.01) | 66.5  | <b>0.005</b>                                           | 0.589                                                 |
| BMI (kg/m <sup>2</sup> )                          | 1095          | 26.9  | 835                    | 1.01<br>(0.99;1.03) | 27.2  | 598                   | 1.01<br>(0.99;1.03) | 27.2  | 0.200                                                  | 0.295                                                 |
| Systolic blood pressure (mmHg)                    | 1102          | 120.0 | 856                    | 1.00<br>(1.00;1.01) | 121.4 | 597                   | 1.00<br>(0.99;1.00) | 118.5 | 0.137                                                  | 0.160                                                 |
| Diastolic blood pressure (mmHg)                   | 1114          | 70.3  | 860                    | 1.01<br>(1.00;1.01) | 71.3  | 603                   | 1.00<br>(0.99;1.00) | 69.7  | 0.087                                                  | 0.352                                                 |
| Heart rate (bpm)                                  | 1078          | 73.0  | 825                    | 1.01<br>(1.00;1.01) | 74.5  | 574                   | 0.99<br>(0.98;1.00) | 70.4  | 0.055                                                  | <b>0.002</b>                                          |
| LVEF (%)                                          | 1105          | 38.3  | 841                    | 1.01<br>(1.00;1.01) | 39.5  | 602                   | 1.00<br>(0.99;1.01) | 38.3  | <b>0.047</b>                                           | 0.958                                                 |
| NT-proBNP levels (pg/mL)                          | 753           | 3828  | 562                    | 1.00<br>(1.00;1.00) | 4161  | 350                   | 1.00<br>(1.00;1.00) | 3216  | 0.376                                                  | 0.117                                                 |
| BNP levels (pg/mL)                                | 309           | 687   | 255                    | 1.00<br>(1.00;1.00) | 912   | 224                   | 1.00<br>(1.00;1.00) | 689.7 | 0.088                                                  | 0.976                                                 |
| Creatinine levels (μmol/L)                        | 1093          | 108.7 | 859                    | 1.00<br>(1.00;1.00) | 103.5 | 598                   | 1.00<br>(1.00;1.00) | 105.4 | 0.086                                                  | 0.285                                                 |
| Haemoglobin (g/L)                                 | 1056          | 12.8  | 837                    | 1.03<br>(0.99;1.08) | 12.9  | 574                   | 1.06<br>(1.01;1.12) | 13.0  | 0.179                                                  | <b>0.021</b>                                          |
| QRS (ms)                                          | 286           | 114.5 | 273                    | 1.00<br>(1.00;1.01) | 116.9 | 173                   | 1.00<br>(0.99;1.01) | 114.0 | 0.385                                                  | 0.875                                                 |
| Weight loss, prior 6 months (kg)                  | 494           | 7.0   | 401                    | 0.99<br>(0.97;1.02) | 6.8   | 294                   | 1.01<br>(0.98;1.03) | 7.3   | 0.669                                                  | 0.461                                                 |
| Smoker (number of cigarettes/day)                 | 116           | 10.1  | 87                     | 1.03<br>(1.00;1.07) | 12.4  | 51                    | 1.00<br>(0.95;1.05) | 10.0  | 0.061                                                  | 0.874                                                 |
| Salt consumption estimated by the patient (g/day) | 1153          | 4.65  | 889                    | 1.07<br>(1.04;1.11) | 5.1   | 626                   | 0.90<br>(0.86;0.94) | 4.06  | <b>0.0001</b>                                          | <b>&lt;0.0001</b>                                     |
| Sex (female)                                      | 357<br>(44.8) |       | 264<br>(33.2)          | 0.94<br>(0.78;1.14) |       | 175<br>(22.0)         | 0.87<br>(0.70;1.08) |       | 0.548                                                  | 0.200                                                 |
| Hypertension                                      | 654<br>(43.7) |       | 519<br>(34.7)          | 1.07<br>(0.90;1.28) |       | 323<br>(21.6)         | 0.81<br>(0.67;0.99) |       | 0.452                                                  | <b>0.038</b>                                          |
| Current smoker                                    | 129<br>(42.7) |       | 100<br>(33.1)          | 1.01<br>(0.76;1.33) |       | 73 (24.2)             | 1.05<br>(0.77;1.42) |       | 0.966                                                  | 0.764                                                 |
| Sleep apnoea syndrome                             | 100<br>(45.2) |       | 62 (28.1)              | 0.79<br>(0.57;1.10) |       | 59 (26.7)             | 1.10<br>(0.78;1.54) |       | 0.160                                                  | 0.596                                                 |
| Diabetes                                          | 341<br>(44.5) |       | 255<br>(33.2)          | 0.96<br>(0.79;1.16) |       | 171<br>(22.3)         | 0.89<br>(0.72;1.11) |       | 0.661                                                  | 0.315                                                 |
| Family history of coronary disease                | 95 (43.2)     |       | 78 (35.5)              | 1.07<br>(0.78;1.46) |       | 47 (21.4)             | 0.90<br>(0.63;1.30) |       | 0.667                                                  | 0.587                                                 |
| Dialysis                                          | 5 (33.3)      |       | 4 (26.7)               | 1.04<br>(0.28;3.88) |       | 6 (40.0)              | 2.22<br>(0.68;7.31) |       | 0.956                                                  | 0.189                                                 |
| Hypercholesterolemia                              | 440<br>(43.3) |       | 332<br>(32.6)          | 0.97<br>(0.81;1.16) |       | 245<br>(24.1)         | 1.04<br>(0.85;1.27) |       | 0.706                                                  | 0.686                                                 |
| Obesity                                           | 227<br>(41.1) |       | 181<br>(32.8)          | 1.04<br>(0.84;1.30) |       | 144<br>(26.1)         | 1.22<br>(0.96;1.54) |       | 0.706                                                  | 0.101                                                 |

|                                                        |               |               |                        |               |                     |                   |                   |
|--------------------------------------------------------|---------------|---------------|------------------------|---------------|---------------------|-------------------|-------------------|
| Chronic obstructive pulmonary disease NYHA (physician) | 97 (50.8)     | 55 (28.8)     | 0.72<br>(0.51;1.01)    | 39 (20.4)     | 0.72<br>(0.49;1.06) | 0.058             | 0.099             |
| I                                                      | 133<br>(41.2) | 93 (28.8)     | 1(ref)                 | 97 (30.0)     | 1(ref)              | 0.258             | <b>0.0002</b>     |
| II                                                     | 487<br>(41.9) | 377<br>(32.5) | 1.11<br>(0.82;1.49)    | 297<br>(25.6) | 0.84<br>(0.62;1.13) | 0.502             | 0.241             |
| III                                                    | 321<br>(43.1) | 275<br>(37.0) | 1.23<br>(0.90;1.67)    | 148<br>(19.9) | 0.63<br>(0.46;0.88) | 0.199             | <b>0.006</b>      |
| IV                                                     | 96 (53.0)     | 59 (32.6)     | 0.88<br>(0.58;1.34)    | 26 (14.4)     | 0.37<br>(0.22;0.62) | 0.546             | <b>0.0001</b>     |
| Chronic vs. <i>de novo</i> HF                          | 896<br>(43.4) | 687<br>(33.3) | 0.90<br>(0.71;1.15)    | 482<br>(23.3) | 1.09<br>(0.83;1.45) | 0.412             | 0.527             |
| Acute HF                                               | 324<br>(43.4) | 278<br>(37.3) | 1.17<br>(0.96;1.42)    | 144<br>(19.3) | 0.76<br>(0.61;0.96) | 0.112             | <b>0.020</b>      |
| Last acute HF episode (decompensation) (months)        |               |               |                        |               |                     |                   |                   |
| 3-12                                                   | 202<br>(39.9) | 171<br>(33.8) | 1(ref)                 | 133<br>(26.3) | 1(ref)              | 0.377             | <b>0.009</b>      |
| <3                                                     | 466<br>(45.1) | 348<br>(33.7) | 0.88<br>(0.69;1.13)    | 219<br>(21.2) | 0.71<br>(0.54;0.94) | 0.319             | <b>0.015</b>      |
| >12                                                    | 311<br>(39.8) | 267<br>(34.2) | 1.01<br>(0.78;1.32)    | 203<br>(26.0) | 0.99<br>(0.75;1.31) | 0.916             | 0.952             |
| Type of cardiopathy                                    |               |               |                        |               |                     |                   |                   |
| Ischemic                                               | 482<br>(43.5) | 350<br>(31.6) | 1(ref)                 | 277<br>(25.0) | 1(ref)              | 0.130             | 0.163             |
| Non ischemic                                           | 535<br>(44.2) | 413<br>(34.1) | 1.06<br>(0.88;1.28)    | 263<br>(21.7) | 0.86<br>(0.69;1.05) | 0.524             | 0.143             |
| Valvular                                               | 73 (36.9)     | 76 (38.4)     | 1.43<br>(1.01;2.03)    | 49 (24.7)     | 1.17<br>(0.79;1.73) | <b>0.043</b>      | 0.436             |
| Sinus rhythm                                           | 728<br>(43.6) | 537<br>(32.2) | 0.89<br>(0.74;1.07)    | 403<br>(24.2) | 1.06<br>(0.86;1.29) | 0.207             | 0.605             |
| Implantable cardioverter defibrillator                 | 299<br>(43.8) | 201<br>(29.5) | 0.83<br>(0.68;1.02)    | 182<br>(26.7) | 1.17<br>(0.94;1.45) | 0.084             | 0.154             |
| Salt diet understood (SD-U) by patient (g/day)         |               |               |                        |               |                     |                   |                   |
| Unknown                                                | 55 (14.8)     | 316<br>(85.2) | 1(ref)                 | 0 (0.00)      | 1(ref)              | <b>&lt;0.0001</b> | <b>&lt;0.0001</b> |
| <3                                                     | 153<br>(31.3) | 0 (0.0)       | 1.00<br>(1.00;1.00)    | 336<br>(68.7) | 1.00<br>(1.00;1.00) | .                 | .                 |
| 3-6                                                    | 337<br>(52.9) | 49 (7.7)      | 0.03<br>(0.02;0.04)    | 251<br>(39.4) | 0.34<br>(0.26;0.44) | <b>&lt;0.0001</b> | <b>&lt;0.0001</b> |
| 6                                                      | 445<br>(65.6) | 194<br>(28.6) | 0.08<br>(0.05;0.11)    | 39 (5.8)      | 0.04<br>(0.03;0.06) | <b>&lt;0.0001</b> | <b>&lt;0.0001</b> |
| None or >6                                             | 163<br>(33.1) | 330<br>(66.9) | 0.35<br>(0.25;0.50)    | 0 (0.0)       | 1.00<br>(1.00;1.00) | <b>&lt;0.0001</b> | .                 |
| Restricted salt diet recommended                       | 967<br>(40.9) | 866<br>(36.6) | 29.02<br>(11.86;70.99) | 533<br>(22.5) | 1.14<br>(0.86;1.53) | <b>&lt;0.0001</b> | 0.361             |
| Restricted salt diet recommended by:                   |               |               |                        |               |                     |                   |                   |
| General practitioner                                   | 271<br>(50.8) | 130<br>(24.4) | 0.56<br>(0.44;0.70)    | 132<br>(24.8) | 0.87<br>(0.69;1.10) | <b>&lt;0.0001</b> | 0.245             |
| Cardiologist                                           | 685<br>(46.9) | 329<br>(22.5) | 0.40<br>(0.34;0.48)    | 447<br>(30.6) | 1.71<br>(1.38;2.10) | <b>&lt;0.0001</b> | <b>&lt;0.0001</b> |
| Dietician                                              | 255<br>(42.9) | 142<br>(23.9) | 0.67<br>(0.53;0.84)    | 198<br>(33.3) | 1.63<br>(1.31;2.03) | <b>0.0005</b>     | <b>&lt;0.0001</b> |
| Nurse                                                  | 78 (55.3)     | 35 (24.8)     | 0.56<br>(0.38;0.85)    | 28 (19.9)     | 0.65<br>(0.41;1.01) | <b>0.006</b>      | 0.053             |

|                                                                                |               |               |                     |               |                     |                 |                 |
|--------------------------------------------------------------------------------|---------------|---------------|---------------------|---------------|---------------------|-----------------|-----------------|
| Low-fat diet                                                                   | 437<br>(41.5) | 346<br>(32.8) | 1.06<br>(0.89;1.28) | 271<br>(25.7) | 1.28<br>(1.05;1.56) | 0.511           | <b>0.017</b>    |
| Water restriction                                                              | 149<br>(38.3) | 126<br>(32.4) | 1.13<br>(0.87;1.46) | 114<br>(29.3) | 1.51<br>(1.15;1.97) | 0.353           | <b>0.003</b>    |
| Diabetic diet<br>(carbohydrate-controlled diet)                                | 334<br>(45.4) | 238<br>(32.3) | 0.91<br>(0.75;1.11) | 164<br>(22.3) | 0.87<br>(0.69;1.08) | 0.370           | 0.203           |
| Natriuretic peptides levels<br>(NT-proBNP and BNP)<br>combined in quartile (Q) |               |               |                     |               |                     |                 |                 |
| Q1                                                                             | 231<br>(39.2) | 192<br>(32.6) | 1(ref)              | 166<br>(28.2) | 1(ref)              | 0.532           | <b>0.044</b>    |
| Q2                                                                             | 260<br>(44.9) | 182<br>(31.4) | 0.84<br>(0.64;1.10) | 137<br>(23.7) | 0.73<br>(0.55;0.98) | 0.211           | <b>0.034</b>    |
| Q3                                                                             | 260<br>(44.4) | 197<br>(33.7) | 0.91<br>(0.70;1.19) | 128<br>(21.9) | 0.69<br>(0.51;0.92) | 0.496           | <b>0.011</b>    |
| Q4                                                                             | 247<br>(42.4) | 205<br>(35.2) | 1.00<br>(0.77;1.30) | 130<br>(22.3) | 0.73<br>(0.55;0.98) | 0.991           | <b>0.036</b>    |
| Patient's frequency of<br>weighing                                             |               |               |                     |               |                     |                 |                 |
| Never                                                                          | 202<br>(46.7) | 162<br>(37.4) | 1(ref)              | 69 (15.9)     | 1(ref)              | < <b>0.0001</b> | <b>0.0007</b>   |
| Daily                                                                          | 266<br>(50.1) | 132<br>(24.9) | 0.62<br>(0.46;0.83) | 133<br>(25.0) | 1.46<br>(1.04;2.06) | <b>0.001</b>    | <b>0.030</b>    |
| Weekly                                                                         | 416<br>(42.9) | 285<br>(29.4) | 0.85<br>(0.66;1.10) | 268<br>(27.7) | 1.89<br>(1.38;2.58) | 0.227           | < <b>0.0001</b> |
| Monthly                                                                        | 247<br>(37.0) | 275<br>(41.2) | 1.39<br>(1.06;1.82) | 146<br>(21.9) | 1.73<br>(1.23;2.43) | <b>0.017</b>    | <b>0.002</b>    |
| Patients with therapeutic<br>education program                                 | 286<br>(45.8) | 171<br>(27.4) | 0.72<br>(0.58;0.89) | 168<br>(26.9) | 1.11<br>(0.89;1.39) | <b>0.003</b>    | 0.348           |
| Live environment, urban<br>vs. rural                                           | 741<br>(45.6) | 521<br>(32.1) | 0.75<br>(0.61;0.91) | 362<br>(22.3) | 0.71<br>(0.57;0.88) | <b>0.004</b>    | <b>0.002</b>    |
| Living situation                                                               |               |               |                     |               |                     |                 |                 |
| Couple                                                                         | 579<br>(43.7) | 405<br>(30.6) | 1(ref)              | 341<br>(25.7) | 1(ref)              | <b>0.016</b>    | <b>0.047</b>    |
| Family                                                                         | 226<br>(48.0) | 145<br>(30.8) | 0.92<br>(0.72;1.17) | 100<br>(21.2) | 0.75<br>(0.57;0.98) | 0.488           | <b>0.038</b>    |
| Retirement<br>home/community                                                   | 18 (45.0)     | 19 (47.5)     | 1.51<br>(0.78;2.91) | 3 (7.5)       | 0.28<br>(0.08;0.97) | 0.220           | <b>0.044</b>    |
| Alone                                                                          | 321<br>(40.5) | 293<br>(37.0) | 1.30<br>(1.07;1.60) | 178<br>(22.5) | 0.94<br>(0.75;1.18) | <b>0.010</b>    | 0.603           |

**Supplemental Table 3.** Determinants of daily estimated salt consumption (SD-T): detailed results from univariate linear regression modelling ( $n = 2822$ ).

|                                    |        | Estimated salt<br>consumption (g/day) | Unadjusted analysis         |                 |
|------------------------------------|--------|---------------------------------------|-----------------------------|-----------------|
|                                    |        | Raw mean (SD)                         | Unadjusted Beta (95%<br>CI) | <i>p</i> -value |
| <b>Demographic data</b>            |        |                                       |                             |                 |
| Age                                |        |                                       | -0.01 (-0.02;0.00)          | <b>0.001</b>    |
| Sex, female vs. male               | No     | 4.89 (2.52)                           | 0(ref)                      | < <b>0.0001</b> |
|                                    | Yes    | 4.17 (2.08)                           | -0.72 (-0.91;-0.52)         |                 |
| Living environment urban vs. rural | Rural  | 4.57 (2.30)                           | 0(ref)                      | <b>0.050</b>    |
|                                    | Urban  | 4.77 (2.46)                           | 0.20 (0.00;0.40)            |                 |
| Living situation                   | Couple | 4.64 (2.33)                           | 0(ref)                      | <b>0.017</b>    |
|                                    | Family | 4.93 (2.51)                           | 0.29 (0.04;0.54)            |                 |

|                                           |                                                  |              |                     |                   |
|-------------------------------------------|--------------------------------------------------|--------------|---------------------|-------------------|
|                                           | Retirement home/community                        | 3.89 (2.22)  | -0.74 (-1.48;-0.01) |                   |
|                                           | Alone                                            | 4.67 (2.50)  | 0.04 (-0.17;0.24)   |                   |
| <b>Heart failure history</b>              |                                                  |              |                     |                   |
| Chronic vs. <i>de novo</i> HF             | De novo                                          | 5.11 (2.54)  | 0(ref)              | <b>&lt;0.0001</b> |
|                                           | Chronic                                          | 4.60 (2.39)  | -0.51 (-0.76;-0.26) |                   |
| Acute vs. stable HF                       | Stable                                           | 4.61 (2.32)  | 0(ref)              | <b>0.009</b>      |
|                                           | Acute                                            | 4.88 (2.61)  | 0.27 (0.07;0.47)    |                   |
| Last acute HF episode, 3-12 months (ref.) | Last acute HF episode months), 3-12 months ref.) | 4.34 (2.30)  | 0(ref)              | <b>0.013</b>      |
|                                           | <3                                               | 4.66 (2.56)  | 0.32 (0.07;0.56)    |                   |
|                                           | >12                                              | 4.71 (2.26)  | 0.37 (0.11;0.64)    |                   |
| Cardiopathy type, ischaemic (ref.)        | Cardiopathy type, ischaemic ref.)                | 4.70 (2.40)  | 0(ref)              | 0.581             |
|                                           | Non-ischaemic                                    | 4.66 (2.47)  | -0.04 (-0.23;0.15)  |                   |
|                                           | Valvular                                         | 4.51 (2.13)  | -0.19 (-0.54;0.17)  |                   |
| <b>Cardiovascular risk factors</b>        |                                                  |              |                     |                   |
| Current smoker                            | No                                               | 4.56 (2.34)  | 0(ref)              | <b>&lt;0.0001</b> |
|                                           | Yes                                              | 5.58 (±2.79) | 1.02 (0.74;1.30)    |                   |
| Number of cigarettes/day                  |                                                  |              | 0.06 (0.02;0.10)    |                   |
| Hypercholesterolemia                      | No                                               | 4.62 (2.37)  | 0(ref)              | 0.115             |
|                                           | Yes                                              | 4.77 (2.49)  | 0.15 (-0.04;0.33)   |                   |
| Hypertension                              | No                                               | 4.67 (2.42)  | 0(ref)              | 0.916             |
|                                           | Yes                                              | 4.68 (2.42)  | 0.01 (-0.17;0.19)   |                   |
| Obesity                                   | No                                               | 4.69 (2.41)  | 0(ref)              | 0.419             |
|                                           | Yes                                              | 4.60 (2.45)  | -0.09 (-0.31;0.13)  |                   |
| Diabetes                                  | No                                               | 4.73 (2.46)  | 0(ref)              | 0.054             |
|                                           | Yes                                              | 4.54 (2.30)  | -0.19 (-0.39;0.00)  |                   |
| Family history of coronary disease        | No                                               | 4.67 (2.42)  | 0(ref)              | 0.624             |
|                                           | Yes                                              | 4.75 (2.38)  | 0.08 (-0.24;0.41)   |                   |
| Dialysis                                  | No                                               | 4.67 (2.42)  | 0(ref)              | 0.860             |
|                                           | Yes                                              | 4.78 (1.93)  | 0.10 (-1.05;1.26)   |                   |
| Sleep apnoea syndrome                     | No                                               | 4.69 (2.42)  | 0(ref)              | 0.223             |
|                                           | Yes                                              | 4.49 (2.34)  | -0.20 (-0.53;0.12)  |                   |
| Chronic obstructive pulmonary disease     | No                                               | 4.63 (2.38)  | 0(ref)              | <b>&lt;0.0001</b> |
|                                           | Yes                                              | 5.28 (2.78)  | 0.65 (0.30;1.00)    |                   |
| <b>Clinical and biological variables</b>  |                                                  |              |                     |                   |
| NYHA class                                | I                                                | 4.88 (2.41)  | 0(ref)              | 0.084             |
|                                           | II                                               | 4.62 (2.40)  | -0.27 (-0.55;0.02)  |                   |
|                                           | III                                              | 4.70 (2.43)  | -0.18 (-0.48;0.13)  |                   |
|                                           | IV                                               | 4.35 (2.35)  | -0.53 (-0.96;-0.10) |                   |
| Self-reported symptoms                    | No symptom                                       | 4.57 (2.30)  | 0(ref)              | 0.559             |
|                                           | Mild exercise symptoms not limiting daily life   | 4.72 (2.39)  | 0.15 (-0.14;0.43)   |                   |
|                                           | Symptoms limiting daily life and/or orthopnoea   | 4.71 (2.45)  | 0.13 (-0.13;0.40)   |                   |
| NT-proBNP and BNP quartiles combined      | 1                                                | 4.90 (2.54)  | 0(ref)              | <b>0.000</b>      |
|                                           | 2                                                | 4.79 (2.39)  | -0.10 (-0.37;0.16)  |                   |
|                                           | 3                                                | 4.50 (2.39)  | -0.40 (-0.67;-0.13) |                   |
|                                           | 4                                                | 4.28 (2.28)  | -0.62 (-0.89;-0.35) |                   |
| Sinus rhythm                              | No                                               | 4.56 (2.36)  | 0(ref)              | <b>0.045</b>      |
|                                           | Yes                                              | 4.75 (2.45)  | 0.19 (0.00;0.37)    |                   |
| Implantable cardioverter defibrillator    | No                                               | 4.79 (2.44)  | 0(ref)              | <b>&lt;0.0001</b> |
|                                           | Yes                                              | 4.35 (2.32)  | -0.44 (-0.64;-0.24) |                   |
| Weight loss within the last 6 months BMI  |                                                  |              | -0.03 (-0.05;-0.01) | <b>0.017</b>      |
|                                           |                                                  |              | 0.00 (-0.02;0.01)   | 0.929             |

|                                                                                |                  |             |                     |                   |
|--------------------------------------------------------------------------------|------------------|-------------|---------------------|-------------------|
| Systolic blood pressure                                                        |                  |             | 0.01 (0.01;0.02)    | <b>&lt;0.0001</b> |
| Diastolic blood pressure                                                       |                  |             | 0.02 (0.01;0.03)    | <b>&lt;0.0001</b> |
| Heart rate                                                                     |                  |             | 0.01 (0.01;0.02)    | <b>&lt;0.0001</b> |
| LVEF                                                                           |                  |             | 0.01 (0.00;0.01)    | 0.085             |
| NT-proBNP levels                                                               |                  |             | 0.00 (0.00;0.00)    | <b>0.033</b>      |
| BNP levels                                                                     |                  |             | 0.00 (0.00;0.00)    | 0.595             |
| Creatinine level                                                               |                  |             | 0.00 (0.00;0.00)    | <b>0.024</b>      |
| Haemoglobin level                                                              |                  |             | 0.06 (0.01;0.10)    | <b>0.020</b>      |
| QRS width                                                                      |                  |             | 0.00 (-0.01;0.00)   | 0.105             |
| <b>Diet-related variables</b>                                                  |                  |             |                     |                   |
| Low-salt diet                                                                  | No               | 6.16 (2.34) | 0(ref)              | <b>&lt;0.0001</b> |
|                                                                                | Yes              | 4.56 (2.39) | -1.61 (-1.95;-1.27) |                   |
| Healthcare professional recommending low-salt diet                             |                  |             |                     |                   |
| General practitioner                                                           | No               | 4.70 (2.40) | 0(ref)              | 0.309             |
|                                                                                | Yes              | 4.58 (2.49) | -0.12 (-0.34;0.11)  |                   |
| Cardiologist                                                                   | No               | 5.15 (2.43) | 0(ref)              | <b>&lt;0.0001</b> |
|                                                                                | Yes              | 4.28 (2.34) | -0.87 (-1.05;-0.69) |                   |
| Dietician                                                                      | No               | 4.77 (2.45) | 0(ref)              | <b>&lt;0.0001</b> |
|                                                                                | Yes              | 4.35 (2.27) | -0.41 (-0.63;-0.20) |                   |
| Nurse                                                                          | No               | 4.66 (2.41) | 0(ref)              | 0.363             |
|                                                                                | Yes              | 4.85 (2.55) | 0.19 (-0.21;0.59)   |                   |
| Water restriction                                                              | No               | 4.74 (2.45) | 0(ref)              | <b>&lt;0.0001</b> |
|                                                                                | Yes              | 4.27 (2.19) | -0.47 (-0.73;-0.22) |                   |
| Diabetic diet (carbohydrate-controlled diet)                                   | No               | 4.70 (2.45) | 0(ref)              | 0.399             |
|                                                                                | Yes              | 4.61 (2.34) | -0.09 (-0.29;0.11)  |                   |
| Low-fat diet                                                                   | No               | 4.71 (2.43) | 0(ref)              | 0.296             |
|                                                                                | Yes              | 4.61 (2.39) | -0.10 (-0.28;0.09)  |                   |
| Salt diet recommended (SD-R) by healthcare professional                        | Unknown          | 4.83 (2.39) | 0(ref)              | <b>&lt;0.0001</b> |
|                                                                                | None or >6 g/day | 5.89 (2.34) | 1.06 (0.62;1.50)    |                   |
|                                                                                | 6 g/day          | 4.91 (2.35) | 0.08 (-0.28;0.45)   |                   |
|                                                                                | 3-6 g/day        | 4.27 (2.35) | -0.56 (-0.93;-0.19) |                   |
|                                                                                | <3 g/day         | 3.67 (2.40) | -1.16 (-1.60;-0.72) |                   |
| Salt diet understood (SD-U) by patient                                         | Unknown          | 4.79 (2.58) | 0(ref)              | <b>&lt;0.0001</b> |
|                                                                                | None or >6 g/day | 5.94 (2.20) | 1.15 (0.85;1.45)    |                   |
|                                                                                | 6 g/day          | 5.04 (2.27) | 0.25 (-0.03;0.53)   |                   |
|                                                                                | 3-6 g/day        | 4.16 (2.16) | -0.63 (-0.92;-0.35) |                   |
|                                                                                | <3 g/day         | 3.44 (2.25) | -1.35 (-1.65;-1.05) |                   |
| Patient compliance with salt diet understood versus estimated salt consumption | Compliant        | 4.72 (2.43) | 0(ref)              | <b>&lt;0.0001</b> |
|                                                                                | Overcompliant    | 3.57 (1.59) | -1.14 (-1.34;-0.95) |                   |
|                                                                                | Undercompliant   | 6.54 (2.36) | 1.82 (1.58;2.05)    |                   |
|                                                                                | Unknown          | 4.79 (2.58) | 0.07 (-0.18;0.33)   |                   |
| Patient frequency of weighing                                                  | None             | 5.39 (2.54) | 0(ref)              | <b>&lt;0.0001</b> |
|                                                                                | Daily            | 3.86 (2.16) | -1.53 (-1.82;-1.24) |                   |
|                                                                                | Weekly           | 4.46 (2.25) | -0.93 (-1.19;-0.68) |                   |
|                                                                                | Monthly          | 5.19 (2.46) | -0.19 (-0.47;0.08)  |                   |
| Patients with therapeutic education program                                    | No               | 4.82 (2.42) | 0(ref)              | <b>&lt;0.0001</b> |
|                                                                                | Yes              | 4.21 (2.34) | -0.61 (-0.82;-0.40) |                   |

BMI, body mass index; BNP, B-type natriuretic peptide; CI, confidence interval; HF, heart failure; IQR,

interquartile range; LVEF, left ventricular ejection fraction; NT-proBNP, N-terminal pro-brain-type natriuretic

peptide; NYHA, New York Heart Association; OR, odds ratio; Q, quartile; ref, reference variable; SD, standard

deviation; SD-R, salt diet recommended; SD-U, salt diet understood.

**Supplementary Table 4.** Determinants of the burden (SD-B) associated with salt diet according to BIRD score: detailed results from univariate logistic regression modelling analysis.

| Factors                                                          | Lowest to<br>medium burden<br>BIRD score<br>Q1 to Q3<br>1983 | Highest burden<br>BIRD score<br>Q4<br>610 | Unadjusted analysis       |         |
|------------------------------------------------------------------|--------------------------------------------------------------|-------------------------------------------|---------------------------|---------|
| N                                                                | Raw estimate                                                 | Raw estimate                              | Unadjusted OR<br>(95% CI) | p-value |
| Demographic data                                                 |                                                              |                                           |                           |         |
| Age, years, median (SD)                                          | 67.3 (13.5)                                                  | 65.30 (14.5)                              | 0.99 (0.98;1.00)          | 0.002   |
| Sex, female vs. male, <i>n</i> (%)                               | 541 (27.2)                                                   | 213 (34.9)                                | 1.43 (1.18;1.74)          | <0.0001 |
| Living environment urban vs. rural, <i>n</i> (%)                 | 1187 (65.6)                                                  | 416 (75.1)                                | 1.58 (1.27;1.96)          | <0.0001 |
| Living situation                                                 |                                                              |                                           |                           |         |
| Couple                                                           | 1015 (51.4)                                                  | 292 (48.0)                                | 1(ref)                    | 0.457   |
| Family                                                           | 364 (18.4)                                                   | 119 (19.6)                                | 1.14 (0.89;1.45)          |         |
| Retirement                                                       |                                                              |                                           |                           |         |
| home/community                                                   | 26 (1.3)                                                     | 11 (1.8)                                  | 1.47 (0.72;3.01)          |         |
| Alone                                                            | 571 (28.9)                                                   | 186 (30.6)                                | 1.13 (0.92;1.40)          |         |
| Heart failure history                                            |                                                              |                                           |                           |         |
| Chronic vs. <i>de novo</i> HF, <i>n</i> (%)                      | 1539 (83.7)                                                  | 488 (85.8)                                | 1.17 (0.90;1.53)          | 0.235   |
| Acute vs. stable HF, <i>n</i> (%)                                | 468 (25.7)                                                   | 252 (45.4)                                | 2.41 (1.98;2.93)          | <0.0001 |
| Last acute HF episode (months), 3-12 months (ref.), <i>n</i> (%) | 401 (23.7)                                                   | 106 (19.5)                                | 1(ref)                    | <0.0001 |
| <3                                                               | 663 (39.2)                                                   | 318 (58.6)                                | 1.81 (1.41;2.34)          |         |
| >12                                                              | 628 (37.1)                                                   | 119 (2)                                   | 0.74 (0.56;0.99)          |         |
| Cardiopathy type, ischaemic (ref.), <i>n</i> (%)                 | 804 (43.3)                                                   | 279 (47.9)                                | 1(ref)                    | 0.136   |
| Non-ischaemic                                                    | 906 (48.8)                                                   | 258 (44.3)                                | 0.82 (0.68;1.00)          |         |
| Valvular                                                         | 148 (8.0)                                                    | 46 (7.9)                                  | 0.90 (0.63;1.28)          |         |
| Cardiovascular risk factors                                      |                                                              |                                           |                           |         |
| Current smoker, <i>n</i> (%)                                     | 226 (11.4)                                                   | 76 (12.3)                                 | 1.09 (0.82;1.44)          | 0.550   |
| Number of cigarettes/day, mean (SD)                              | 10.6 (8.0)                                                   | 11.1 (6.9)                                | 1.01 (0.97;1.05)          | 0.650   |
| Hypercholesterolemia, <i>n</i> (%)                               | 734 (37.0)                                                   | 263 (42.5)                                | 1.26 (1.05;1.51)          | 0.015   |
| Hypertension, <i>n</i> (%)                                       | 1065 (53.7)                                                  | 373 (60.3)                                | 1.31 (1.09;1.57)          | 0.004   |
| Obesity, <i>n</i> (%)                                            | 406 (20.5)                                                   | 135 (21.8)                                | 1.08 (0.87;1.35)          | 0.475   |
| Diabetes, <i>n</i> (%)                                           | 521 (26.3)                                                   | 235 (38.0)                                | 1.72 (1.42;2.08)          | <0.0001 |
| Family history of coronary disease, <i>n</i> (%)                 | 167 (8.4)                                                    | 52 (8.4)                                  | 1.00 (0.72;1.38)          | 0.987   |
| Dialysis, <i>n</i> (%)                                           | 15 (0.8)                                                     | 2 (0.3)                                   | 0.43 (0.10;1.86)          | 0.257   |
| Sleep apnoea syndrome, <i>n</i> (%)                              | 151 (7.6)                                                    | 69 (11.1)                                 | 1.52 (1.13;2.06)          | 0.006   |
| Chronic obstructive pulmonary disease, <i>n</i> (%)              | 113 (5.7)                                                    | 74 (12.0)                                 | 2.25 (1.65;3.06)          | <0.0001 |
| Clinical and biological variables                                |                                                              |                                           |                           |         |
| NYHA class, <i>n</i> (%)                                         |                                                              |                                           |                           |         |
| I                                                                | 279 (15.8)                                                   | 46 (8.1)                                  | 1(ref)                    | <0.0001 |
| II                                                               | 904 (51.1)                                                   | 215 (38.1)                                | 1.44 (1.02;2.04)          |         |
| III                                                              | 478 (27.0)                                                   | 246 (43.5)                                | 3.12 (2.20;4.42)          |         |
| IV                                                               | 109 (6.2)                                                    | 58 (10.3)                                 | 3.23 (2.07;5.04)          |         |
| Self-reported symptoms, <i>n</i> (%)                             |                                                              |                                           |                           |         |
| No symptom                                                       | 334 (18.6)                                                   | 43 (7.4)                                  | 1(ref)                    | <0.0001 |
| Mild exercise symptoms                                           |                                                              |                                           |                           |         |
| not limiting daily life                                          | 680 (37.8)                                                   | 151 (25.9)                                | 1.72 (1.20;2.48)          |         |
| Symptoms limiting daily                                          |                                                              |                                           |                           |         |
| life and/or orthopnoea                                           | 783 (43.6)                                                   | 388 (66.7)                                | 3.85 (2.74;5.41)          |         |
| NT-proBNP and BNP quartiles                                      |                                                              |                                           |                           |         |
| combined, <i>n</i> (%)                                           |                                                              |                                           |                           |         |
| Q1                                                               | 468 (27.5)                                                   | 108 (19.3)                                | 1(ref)                    | <0.0001 |
| Q2                                                               | 427 (25.1)                                                   | 136 (24.3)                                | 1.38 (1.04;1.79)          |         |
| Q3                                                               | 418 (24.5)                                                   | 150 (26.8)                                | 1.56 (1.17;2.06)          |         |
| Q4                                                               | 390 (22.9)                                                   | 165 (29.5)                                | 1.83 (1.39;2.42)          |         |
| Sinus rhythm, <i>n</i> (%)                                       | 1273 (64.2)                                                  | 362 (58.5)                                | 0.79 (0.65;0.94)          | 0.010   |
| Implantable cardioverter defibrillator, <i>n</i> (%)             | 499 (25.2)                                                   | 188 (30.4)                                | 1.30 (1.06;1.58)          | 0.010   |
| Weight loss within the last 6 months, kg, medium (IOR)           | 5.0 (3.0;10.0)                                               | 5.0 (3.0;10.0)                            | 1.00 (0.98;1.02)          | 0.978   |

|                                                                                                      |                  |                 |                 |                  |                   |
|------------------------------------------------------------------------------------------------------|------------------|-----------------|-----------------|------------------|-------------------|
| BMI, kg/m <sup>2</sup> , mean (SD)                                                                   |                  | 27.2 (6.1)      | 26.8 (5.7)      | 0.99 (0.97;1.00) | 0.127             |
| Systolic blood pressure, mmHg, mean (SD)                                                             |                  | 121.0 (20.8)    | 115.9 (19.5)    | 0.99 (0.98;0.99) | <b>&lt;0.0001</b> |
| Diastolic blood pressure, mmHg, mean (SD)                                                            |                  | 70.9 (12.3)     | 69.0 (12.1)     | 0.99 (0.98;0.99) | <b>0.001</b>      |
| Heart rate, bpm, mean (SD)                                                                           |                  | 72.2 (15.7)     | 74.3 (16.5)     | 1.01 (1.00;1.01) | <b>0.005</b>      |
| LVEF, %, mean (SD)                                                                                   |                  | 39.2 (13.7)     | 36.0 (13.2)     | 0.98 (0.98;0.99) | <b>&lt;0.0001</b> |
| NT-proBNP levels, pg/mL, median (IQR)                                                                |                  | 1574 (621;3856) | 2250 (958;5255) | 1.00 (1.00;1.00) | <b>0.015</b>      |
| BNP levels, pg/mL, median (IQR)                                                                      |                  | 424 (158;832)   | 471 (224;927)   | 1.00 (1.00;1.00) | 0.101             |
| Creatinine level, µmol/L, median (IQR)                                                               |                  | 98 (76;127)     | 103 (80;131)    | 1.00 (1.00;1.00) | <b>0.050</b>      |
| Haemoglobin level, g/L, mean (SD)                                                                    |                  | 13.0 (1.9)      | 12.5 (1.9)      | 0.87 (0.83;0.91) | <b>&lt;0.0001</b> |
| QRS width, ms, mean (SD)                                                                             |                  | 115.4 (33.9)    | 116.3 (31.9)    | 1.00 (1.00;1.00) | 0.770             |
| <b>Diet-related variables</b>                                                                        |                  |                 |                 |                  |                   |
| Estimated salt consumption, g/day, mean (SD)                                                         |                  | 4.8 (2.3)       | 4.4 (2.6)       | 0.93 (0.90;0.97) | <b>0.001</b>      |
| Low-salt diet, <i>n</i> (%)                                                                          |                  | 1829 (92.2)     | 599 (96.8)      | 2.52 (1.57;4.05) | <b>&lt;0.0001</b> |
| Healthcare professional recommending low-salt diet, <i>n</i> (%)                                     |                  |                 |                 |                  |                   |
| General practitioner                                                                                 |                  | 372 (18.8)      | 165 (26.7)      | 1.57 (1.27;1.94) | <b>&lt;0.0001</b> |
| Cardiologist                                                                                         |                  | 1066 (53.8)     | 400 (64.6)      | 1.57 (1.30;1.89) | <b>&lt;0.0001</b> |
| Dietician                                                                                            |                  | 452 (22.8)      | 148 (23.9)      | 1.06 (0.86;1.32) | 0.565             |
| Nurse                                                                                                |                  | 96 (4.8)        | 47 (7.6)        | 1.62 (1.13;2.32) | <b>0.009</b>      |
| Water restriction, <i>n</i> (%)                                                                      |                  | 287 (14.5)      | 85 (13.7)       | 0.94 (0.72;1.22) | 0.646             |
| Diabetic diet (carbohydrate-controlled diet), <i>n</i> (%)                                           |                  | 486 (24.5)      | 227 (36.7)      | 1.78 (1.47;2.16) | <b>&lt;0.0001</b> |
| Low-fat diet, <i>n</i> (%)                                                                           |                  | 752 (37.9)      | 275 (44.4)      | 1.31 (1.09;1.57) | <b>0.004</b>      |
| Salt diet recommended (SD-R) by healthcare professional, <i>n</i> (%)                                | Unknown          | 133 (6.7)       | 30 (4.8)        | 1(ref)           | <b>&lt;0.0001</b> |
|                                                                                                      | None or >6 g/day | 205 (10.3)      | 32 (5.2)        | 0.69 (0.40;1.19) |                   |
|                                                                                                      | 6 g/day          | 837 (42.2)      | 262 (42.3)      | 1.39 (0.91;2.11) |                   |
|                                                                                                      | 3-6 g/day        | 645 (32.5)      | 206 (33.3)      | 1.42 (0.92;2.17) |                   |
|                                                                                                      | <3 g/day         | 163 (8.2)       | 89 (14.4)       | 2.42 (1.51;3.88) |                   |
| Salt diet understood (SD-U) by patient, <i>n</i> (%)                                                 | Unknown          | 244 (12.3)      | 81 (13.1)       | 1(ref)           | <b>&lt;0.0001</b> |
|                                                                                                      | None or >6 g/day | 402 (20.3)      | 62 (10.0)       | 0.46 (0.32;0.67) |                   |
|                                                                                                      | 6 g/day          | 500 (25.2)      | 179 (28.9)      | 1.08 (0.80;1.46) |                   |
|                                                                                                      | 3-6 g/day        | 499 (25.2)      | 141 (22.8)      | 0.85 (0.62;1.16) |                   |
|                                                                                                      | <3 g/day         | 338 (17.0)      | 156 (25.2)      | 1.39 (1.01;1.90) |                   |
| Patients compliance with salt diet understood (SD-U) versus estimated salt consumption, <i>n</i> (%) | Compliant        | 671 (33.8)      | 200 (32.3)      | 1(ref)           | 0.192             |
|                                                                                                      | Overcompliant    | 703 (35.5)      | 202 (32.6)      | 0.96 (0.77;1.20) |                   |
|                                                                                                      | Undercompliant   | 365 (18.4)      | 136 (22.0)      | 1.25 (0.97;1.61) |                   |
|                                                                                                      | Unknown          | 244 (12.3)      | 81 (13.1)       | 1.11 (0.83;1.50) |                   |
| Patient's frequency of weighing, <i>n</i> (%)                                                        | Never            | 339 (17.3)      | 95 (15.8)       | 1(ref)           | <b>0.001</b>      |
|                                                                                                      | Daily            | 368 (18.8)      | 160 (26.5)      | 1.55 (1.16;2.08) |                   |
|                                                                                                      | Weekly           | 737 (37.7)      | 212 (35.2)      | 1.03 (0.78;1.35) |                   |
|                                                                                                      | Monthly          | 510 (26.1)      | 136 (22.6)      | 0.95 (0.71;1.28) |                   |
| Patients with therapeutic education program                                                          |                  | 486 (24.5)      | 149 (24.1)      | 0.98 (0.79;1.21) | 0.825             |

BIRD, burden scale in restricted diets; BMI, body mass index; BNP, B-type natriuretic peptide; CI, confidence interval; HF, heart failure; IQR, interquartile range; LVEF, left ventricular ejection fraction; NT-proBNP, N-terminal pro-brain-type natriuretic peptide; NYHA, New York Heart Association; OR, odds ratio; Q, quartile; ref, reference variable; SD, standard deviation; SD-R, salt diet recommended; SD-U, salt diet understood.
